# Supplementary material for: DFT study on the adsorption of 5-fluorouracil on B40, B39M, and M@B40(M = Mg, Al, Si, Mn, Cu, Zn)
Source: Royal Society of Chemistry journal article supplement (doi:10.1039/d1ra08308b), 2021-01-01
Supplement: d1ra08308b1.pdf [file d1ra08308b1.pdf]

The supplementary information for

**A theoretical study on the adsorption of 5-fluorouracil on B<sub>40</sub>,  
B<sub>39</sub>M, and M@B<sub>40</sub> (M = Mg, Al, Si, Mn, Cu, and Zn) nanocages:  
Implications for drug delivery**

Li Zhang,<sup>a</sup> Zi-Dan Qi,<sup>a</sup> Ya-Ling Ye,<sup>a</sup> Xiang-Hui Li,<sup>b,c</sup> Jing-Hua Chen,<sup>a</sup> Wei-Ming Sun<sup>a\*</sup>

<sup>a</sup>*Fujian Key Laboratory of Drug Target Discovery and Structural and Functional Research, The School of Pharmacy, Fujian Medical University, Fuzhou 350108, People's Republic of China.*

*E-mail address: [sunwm@fjmu.edu.cn](mailto:sunwm@fjmu.edu.cn)*

<sup>b</sup>*The School of Medical Technology and Engineering, Fujian Medical University, Fuzhou 350004, Fujian, People's Republic of China*

<sup>c</sup>*Key Laboratory of OptoElectronic Science and Technology for Medicine of Ministry of Education, Fujian Provincial Key Laboratory of Photonics Technology, Fujian Normal University, Fuzhou 350007, Fujian, People's Republic of China*

## Table of Contents

|                                                                                                                                                                              |            |
|------------------------------------------------------------------------------------------------------------------------------------------------------------------------------|------------|
| <b>1. Tables</b> .....                                                                                                                                                       | <b>S3</b>  |
| <b>Table S1.</b> Relatively energies of Mn@B <sub>40</sub> and B <sub>39</sub> Mn clusters with various spin multiplicities.....                                             | <b>S3</b>  |
| <b>Table S2.</b> The relatively large $E^2$ for the critical donor-acceptor interactions of 5-Fu@B <sub>40</sub> , 5-Fu@[M@B <sub>40</sub> ] and 5-Fu@B <sub>39</sub> M..... | <b>S4</b>  |
| <b>2. Figures</b> .....                                                                                                                                                      | <b>S6</b>  |
| <b>Figure. S1</b> ESP plots for M@B <sub>40</sub> cages.....                                                                                                                 | <b>S6</b>  |
| <b>Figure. S2</b> LMOs related to the B-O bonds in 5-Fu@[M@B <sub>40</sub> ] .....                                                                                           | <b>S7</b>  |
| <b>Figure. S3</b> ELF plots for 5-Fu@[M@B <sub>40</sub> ].....                                                                                                               | <b>S8</b>  |
| <b>Figure. S4</b> HOMO and LUMO orbitals of 5-Fu@[M@B <sub>40</sub> ].....                                                                                                   | <b>S9</b>  |
| <b>Figure. S5</b> ESP plots for B <sub>39</sub> M cages.....                                                                                                                 | <b>S10</b> |
| <b>Figure. S6</b> LMOs related to the M-O bonds in 5-Fu@B <sub>39</sub> M .....                                                                                              | <b>S11</b> |
| <b>Figure. S7</b> ELF plots for 5-Fu@B <sub>39</sub> M.....                                                                                                                  | <b>S12</b> |
| <b>Figure. S8</b> HOMO and LUMO orbitals of 5-Fu@B <sub>39</sub> M.....                                                                                                      | <b>S13</b> |
| <b>3. Cartesian coordinates</b> .....                                                                                                                                        | <b>S14</b> |

## 1. Tables

**Table S1** The relatively energies (kcal/mol) of Mn@B<sub>40</sub> and B<sub>39</sub>Mn clusters with various spin multiplicities at the B3LYP-D3/6-31G(d)&SDD level.

|                    | Spin Multiplicities |         |         |             |             |        |        |
|--------------------|---------------------|---------|---------|-------------|-------------|--------|--------|
|                    | singlet             | doublet | triplet | quartet     | quintet     | sextet | septet |
| Mn@B <sub>40</sub> |                     | 26.91   |         | <b>0.00</b> |             | 8.97   |        |
| B <sub>39</sub> Mn | 74.47               |         | 43.20   |             | <b>0.00</b> |        | 25.96  |

**Table S2** The relatively large second order perturbation energies ( $E^2$ , in kcal/mol) for the critical donor-acceptor NBO interactions of the most stable 5-Fu@B<sub>40</sub>, 5-Fu@[M@B<sub>40</sub>] and 5-Fu@B<sub>39</sub>M (M = Mg, Al, Si, Mn, Cu, and Zn) complexes at the SMD-M06-2X-D3/6-311+G(d, p)&SDD level.

| Complex                    | Donor NBO (i) | Acceptor NBO (j) | $E^2$  |
|----------------------------|---------------|------------------|--------|
| 5-Fu@B <sub>40</sub>       | BD (C6-O2)    | LP*(B25)         | 32.20  |
|                            | LP (O2)       | LP*(B25)         | 359.57 |
|                            | CR (O2)       | LP*(B25)         | 16.47  |
| 5-Fu@[Mg@B <sub>40</sub> ] | BD (C7-O1)    | LP*(B36)         | 36.28  |
|                            | LP (O1)       | LP*(B36)         | 368.35 |
|                            | CR (O1)       | LP*(B36)         | 17.58  |
| 5-Fu@[Al@B <sub>40</sub> ] | BD (C7-O1)    | LP*(B26)         | 18.36  |
|                            | LP (O1)       | LP*(B26)         | 188.53 |
|                            | CR (O1)       | LP*(B26)         | 9.63   |
| 5-Fu@[Si@B <sub>40</sub> ] | BD (C6-O2)    | LP*(B35)         | 32.20  |
|                            | LP (O2)       | LP*(B35)         | 359.30 |
|                            | CR (O2)       | LP*(B35)         | 16.53  |
| 5-Fu@[Mn@B <sub>40</sub> ] | BD (C6-O2)    | BD*(B1-B7)       | 71.43  |
|                            | LP (O2)       | LP*(B7)          | 344.90 |
|                            | CR (O2)       | BD*(B6-B7)       | 3.30   |
| 5-Fu@[Cu@B <sub>40</sub> ] | BD (C7-O1)    | LP*(B25)         | 23.69  |
|                            | LP (O1)       | LP*(B25)         | 221.49 |
|                            | CR (O1)       | LP*(B25)         | 11.73  |
| 5-Fu@[Zn@B <sub>40</sub> ] | BD (C6-O2)    | LP*(B17)         | 32.77  |
|                            | LP (O2)       | LP*(B17)         | 350.32 |
|                            | CR (O2)       | LP*(B17)         | 16.44  |
| 5-Fu@B <sub>39</sub> Mg    | BD (C6-O2)    | LP*(Mg52)        | 6.16   |
|                            | LP (O2)       | LP*(Mg52)        | 27.57  |
|                            | CR (O2)       | LP*(Mg52)        | 4.04   |
| 5-Fu@B <sub>39</sub> Al    | BD (C6-O2)    | LP*(Al40)        | 14.40  |
|                            | LP (O2)       | LP*(Al40)        | 79.96  |

|                         |            |           |        |
|-------------------------|------------|-----------|--------|
|                         | CR (O2)    | LP*(Al40) | 10.64  |
| 5-Fu@B <sub>39</sub> Si | BD (C6-O2) | LP*(B17)  | 17.63  |
|                         | LP (O2)    | LP*(B17)  | 190.68 |
|                         | CR (O2)    | LP*(B17)  | 9.18   |
| 5-Fu@B <sub>39</sub> Mn | BD (C6-O2) | LP*(Mn52) | 4.27   |
|                         | LP (O2)    | LP*(Mn52) | 27.01  |
|                         | CR (O2)    | LP*(Mn52) | 3.42   |
| 5-Fu@B <sub>39</sub> Cu | BD (C6-O2) | LP*(Cu52) | 2.87   |
|                         | LP (O2)    | LP*(Cu52) | 27.40  |
|                         | CR (O2)    | LP*(Cu52) | 2.53   |
| 5-Fu@B <sub>39</sub> Zn | BD (C6-O2) | LP*(Zn52) | 2.46   |
|                         | LP (O2)    | LP*(Zn52) | 8.89   |
|                         | CR (O2)    | LP*(Zn52) | 2.22   |

“BD”≈ 2-center bond; “CR”≈1-center core pair; “LP”≈1-center valence lone pair

## 2. Figures

**Figure. S1** The ESP plots in conjunction with the extreme values for  $M@B_{40}$  ( $M = \text{Mg, Al, Si, Mn, Cu, and Zn}$ ) cages. The yellow and cyan balls correspond to the maximum and minimum point of electrostatic potential, respectively.

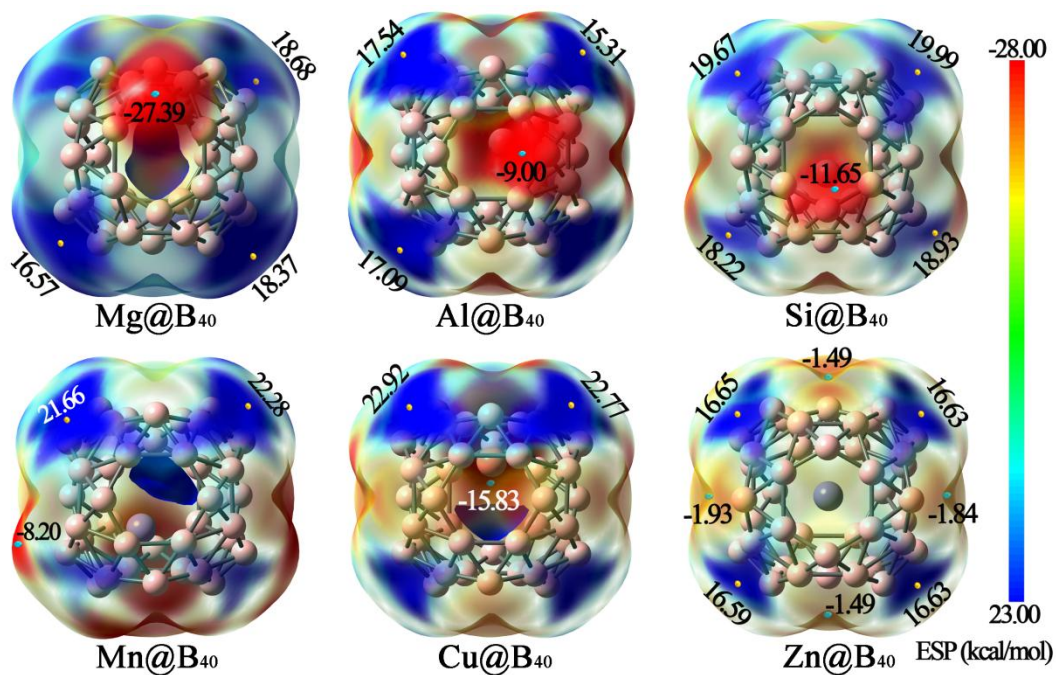

**Figure. S2** LMOs related to the B-O bonds in 5-Fu@[M@B<sub>40</sub>] (M = Mg, Al, Si, Mn, Cu, and Zn) complexes. The contributions of linked atoms to LMO are also given next to them.

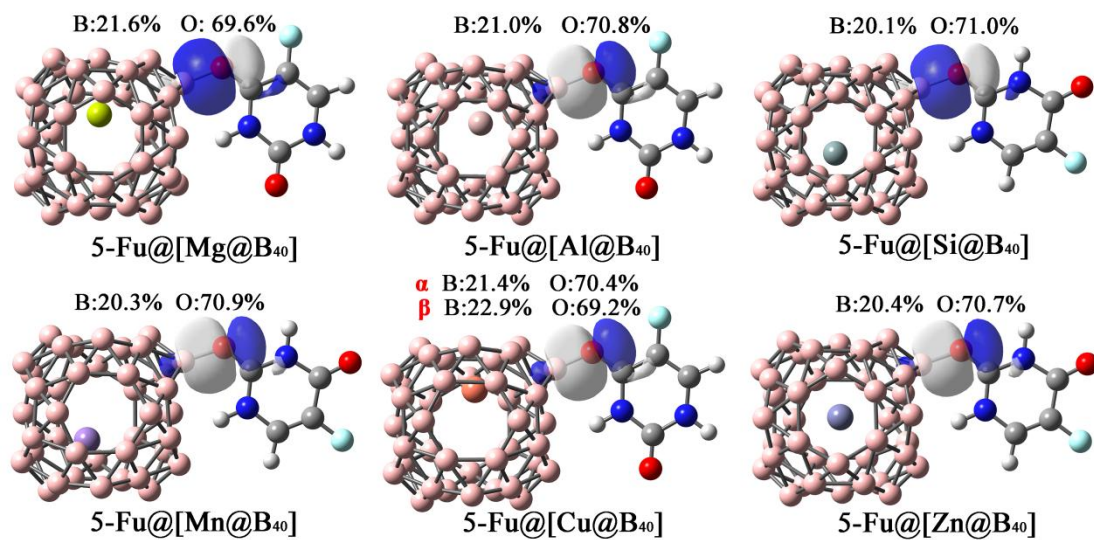

**Figure. S3** ELF plots for 5-Fu@[M@B<sub>40</sub>] (M = Mg, Al, Si, Mn, Cu, and Zn).

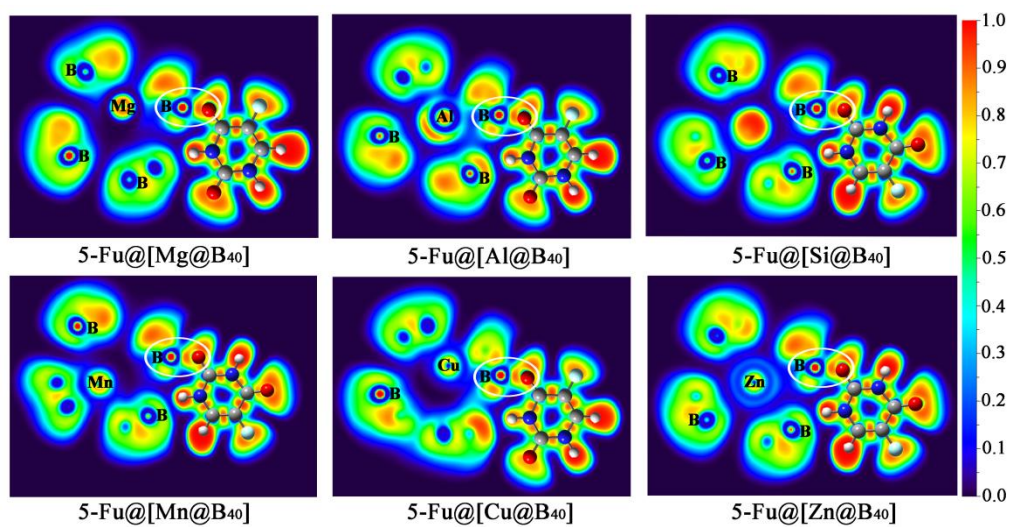



**Figure. S4** The HOMO and LUMO orbitals of 5-Fu@[M@B<sub>40</sub>] (M = Mg, Al, Si, Mn, Cu, and Zn) complexes with isovalue of 0.02 a.u.

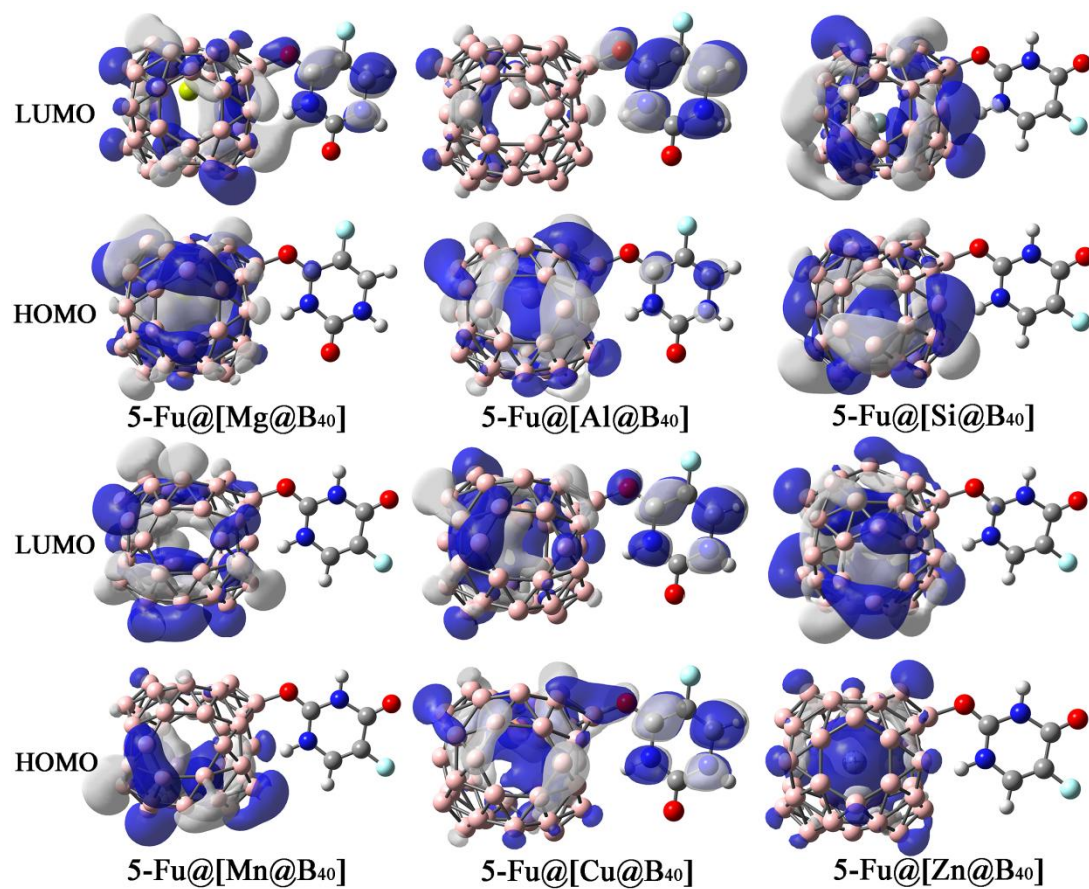

**Figure. S5** The ESP plots in conjunction with the extreme values for  $B_{39}M$  ( $M = \text{Mg}, \text{Al}, \text{Si}, \text{Mn}, \text{Cu}, \text{and Zn}$ ) cages. The yellow and cyan balls correspond to the maximum and minimum point of electrostatic potential, respectively.

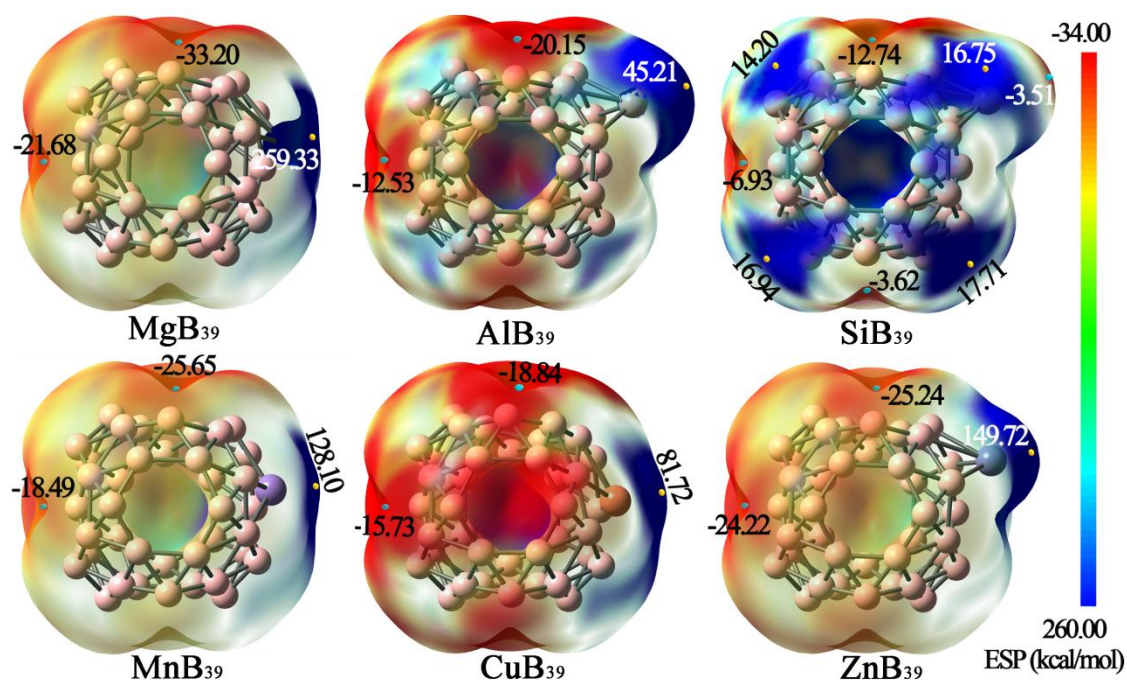

**Figure. S6** LMOs related to the M-O bonds in 5-Fu@B<sub>39</sub>M (M = Mg, Al, Mn, Cu, and Zn) complexes. The contributions of linked atoms to LMO are also given next to them.

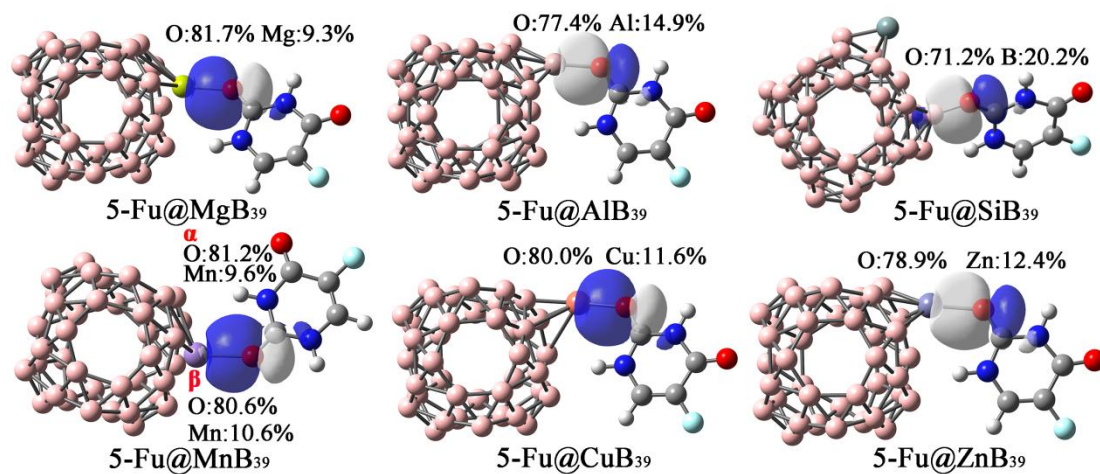

Figure. S7 ELF plots for 5-Fu@B<sub>39</sub>M (M = Mg, Al, Mn, Cu, and Zn).

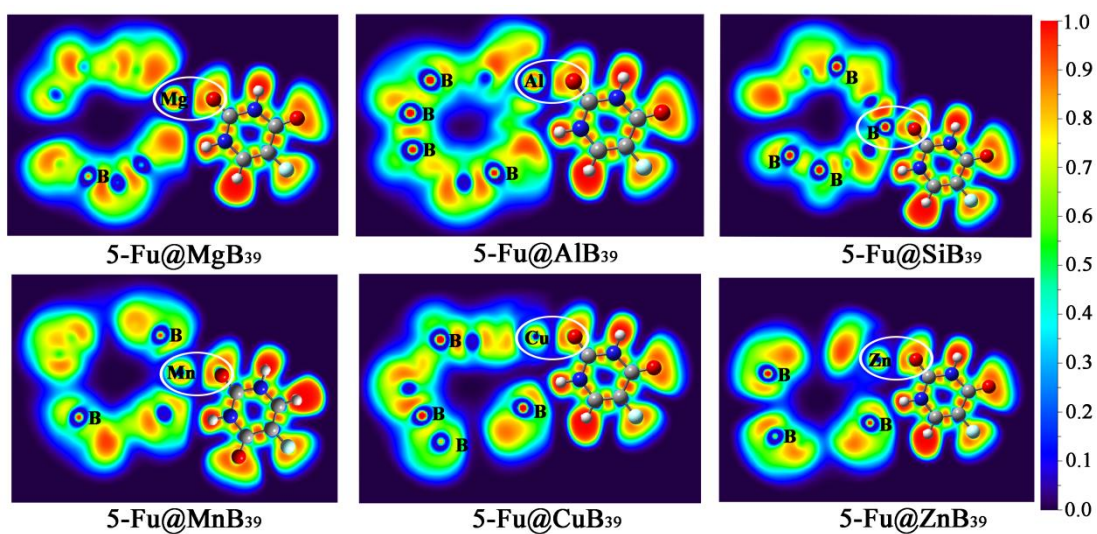

**Figure. S8** The HOMO and LUMO orbitals of 5-Fu@B<sub>39</sub>M (M = Mg, Al, Si, Mn, Cu, and Zn) complexes with isovalue of 0.02 a.u.

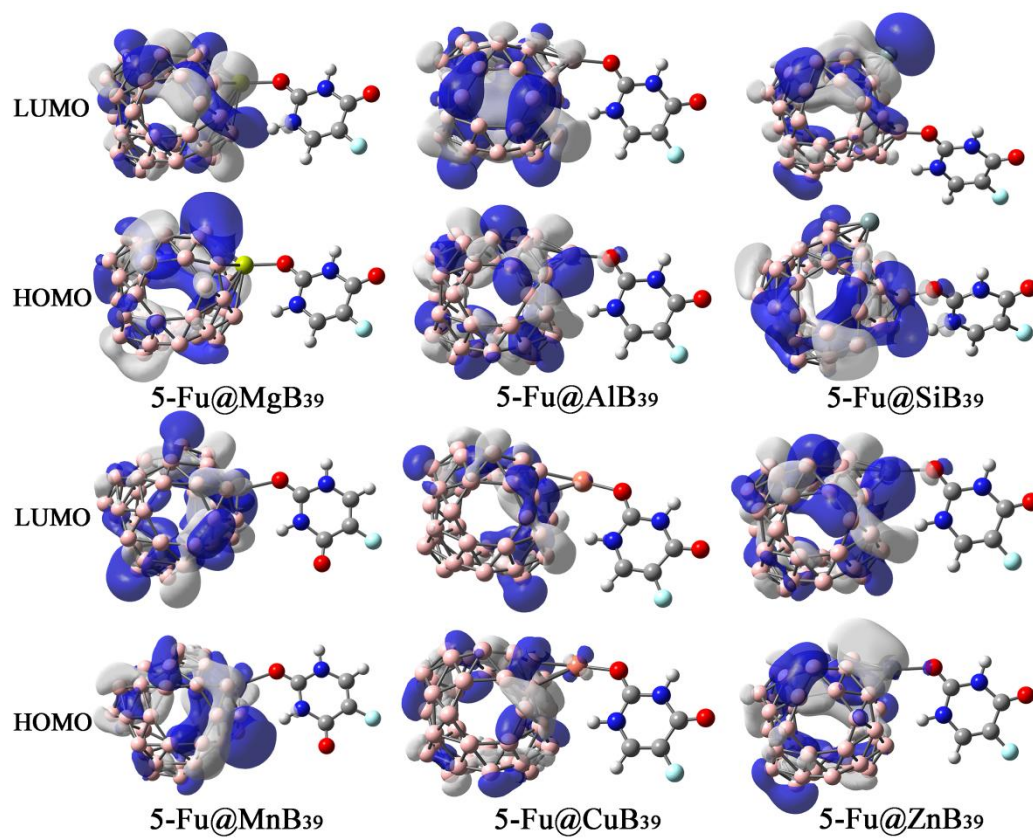

### 3. Cartesian Coordinates

#### (1) 5-Fu@B<sub>40</sub> complex at the B3LYP-D3/6-31G(d) level

##### 5-Fu@B<sub>40</sub>

|   |             |             |             |
|---|-------------|-------------|-------------|
| B | 3.24255500  | 2.13496100  | 1.48704000  |
| B | 1.83074500  | 2.47428900  | 2.19251700  |
| B | 2.55441900  | 1.08342800  | 2.66398800  |
| B | 3.18811600  | -0.39956100 | 2.92650000  |
| B | 4.04640500  | 0.50706800  | 1.89100900  |
| B | 4.58435100  | 1.45801100  | 0.71165800  |
| B | 3.77060800  | 2.60281200  | -0.02406700 |
| B | 4.27038300  | 1.25360300  | -0.91839100 |
| B | 2.93006400  | 2.43399000  | -1.37582700 |
| B | 3.34989200  | 0.98526600  | -2.34854200 |
| B | 2.06868700  | 1.96024000  | -2.67162600 |
| B | -0.69332600 | 1.02052600  | 1.57911200  |
| B | -0.17269400 | -0.02461000 | 2.69186100  |
| B | 0.79112600  | 1.29125000  | 2.56372300  |
| B | 0.48281100  | 2.42008700  | 1.30101000  |
| B | 0.24711100  | 2.99243200  | -0.25296200 |
| B | -0.88514500 | 2.07699100  | 0.37857500  |
| B | 1.18359400  | 2.64802000  | -1.50663400 |
| B | -0.43698700 | 1.75369700  | -1.19997900 |
| B | 0.58851100  | 1.27032500  | -2.49155200 |
| B | -0.00046700 | -2.28344900 | 0.86881900  |
| B | 1.31066300  | -2.77150600 | 1.74319200  |
| B | 0.52161200  | -1.44132700 | 2.26116600  |
| B | -0.79168700 | -0.74347800 | 1.35858200  |
| B | -1.44962000 | -1.54087500 | 0.05892400  |
| B | -0.31784500 | -2.46930300 | -0.73178100 |
| B | -0.69997300 | -1.01794900 | -1.43227000 |
| B | 0.71528700  | -2.06056800 | -1.85332600 |
| B | -0.77917400 | 0.46561700  | -2.10846600 |
| B | 0.43262700  | -0.48077300 | -2.64138500 |
| B | 1.73038400  | -1.40835500 | -2.96959000 |
| B | 3.86237400  | -1.23483700 | 1.70809600  |
| B | 2.28886700  | -1.69314900 | 2.44825600  |
| B | 2.75983400  | -2.56997800 | 1.05159500  |
| B | 3.21482400  | -2.83829800 | -0.53187000 |
| B | 4.23876100  | -2.05116800 | 0.38557000  |
| B | 2.46502900  | -2.28486800 | -1.83513900 |
| B | 4.02389600  | -1.49033300 | -1.17080700 |
| B | 3.15217200  | -0.77936800 | -2.48721100 |
| B | 4.46408400  | -0.07674100 | -1.81714300 |

|   |             |             |             |
|---|-------------|-------------|-------------|
| C | -3.84149000 | -0.96772000 | 0.01024100  |
| N | -5.15025000 | -1.31523300 | -0.05406400 |
| C | -6.26888200 | -0.43314100 | -0.05102200 |
| C | -5.84928000 | 0.96711400  | 0.03682300  |
| C | -4.54897100 | 1.31320200  | 0.10290500  |
| N | -3.55967500 | 0.34496800  | 0.08308000  |
| H | -4.20773100 | 2.33836100  | 0.17233600  |
| O | -2.96056500 | -1.88905800 | -0.00934200 |
| H | -5.36318500 | -2.30675000 | -0.11562000 |
| H | -2.57796800 | 0.64270700  | 0.16993700  |
| O | -7.40149500 | -0.85380700 | -0.11426200 |
| F | -6.81642100 | 1.88034900  | 0.05025200  |

**(2) 5-Fu@[M@B<sub>40</sub>] (M = Mg, Al, Si, Mn, Cu, and Zn) complexes at the B3LYP-D3/6-31G(d)&SDD level**

**5-Fu@[Mg@B<sub>40</sub>]**

|   |             |             |             |
|---|-------------|-------------|-------------|
| B | -0.88710600 | 2.61590400  | -1.14512500 |
| B | -1.79277300 | 1.77495100  | -2.19030200 |
| B | -2.41241000 | 1.83000800  | -0.68230100 |
| B | -2.73728300 | 1.67503600  | 0.90752200  |
| B | -1.34948700 | 2.52203600  | 0.61389500  |
| B | -0.00051600 | 3.23710300  | 0.13165100  |
| B | 0.75996700  | 2.95814300  | -1.23044900 |
| B | 1.56958900  | 2.66530000  | 0.22126900  |
| B | 1.97708200  | 1.95245200  | -1.44340000 |
| B | 2.75027900  | 1.39532200  | 0.08157400  |
| B | 3.02962700  | 0.71452100  | -1.38416900 |
| B | -1.73182400 | -1.17333100 | -2.05880800 |
| B | -3.00560400 | -1.02920000 | -0.99517300 |
| B | -2.47179900 | 0.38079500  | -1.65926100 |
| B | -1.10751000 | 0.42784600  | -2.74957100 |
| B | 0.48536000  | 0.15850600  | -3.27791200 |
| B | -0.43286900 | -1.10230000 | -3.01318700 |
| B | 1.80080900  | 0.53018200  | -2.44993400 |
| B | 1.16182600  | -1.19921300 | -2.53953900 |
| B | 2.52574600  | -0.83511400 | -1.51320000 |
| B | -1.46210500 | -2.40727700 | 1.09339300  |
| B | -2.17775800 | -1.34068800 | 2.10062500  |
| B | -2.82519700 | -1.28243600 | 0.59970500  |
| B | -1.80151800 | -2.12538400 | -0.65737400 |
| B | -0.61056000 | -3.05654800 | -0.19653000 |
| B | 0.16540800  | -2.99342000 | 1.20664900  |
| B | 1.07452400  | -2.92547300 | -0.20528900 |
| B | 1.57840600  | -2.27708500 | 1.42765600  |

|    |             |             |             |
|----|-------------|-------------|-------------|
| B  | 1.79056300  | -2.30611300 | -1.52804200 |
| B  | 2.43896200  | -1.84511900 | -0.09095100 |
| B  | 2.86173200  | -1.23126600 | 1.36405400  |
| B  | -1.40970200 | 1.46691300  | 1.93582600  |
| B  | -2.53004400 | 0.17476000  | 1.54757800  |
| B  | -1.23671400 | -0.11220200 | 2.68647900  |
| B  | 0.38361500  | -0.20029200 | 3.15093900  |
| B  | -0.27067700 | 1.34214900  | 3.16988000  |
| B  | 1.62682500  | -0.81136700 | 2.40623800  |
| B  | 1.34080400  | 0.98361200  | 2.51090700  |
| B  | 2.68022500  | 0.37700400  | 1.50080300  |
| B  | 2.20924900  | 1.94911200  | 1.52795400  |
| Mg | -0.00130300 | -0.48167600 | 0.54907800  |
| C  | 0.35297000  | 5.50692900  | 3.19469900  |
| N  | 0.15620300  | 4.12117500  | 3.29244900  |
| C  | -0.18345800 | 3.43426600  | 4.42237100  |
| C  | -0.34285700 | 4.19600800  | 5.61479700  |
| C  | -0.15405900 | 5.54254800  | 5.58993900  |
| N  | 0.18387500  | 6.16395300  | 4.41174200  |
| H  | -0.26035700 | 6.15618400  | 6.47502500  |
| O  | 0.64201700  | 6.06737400  | 2.16230100  |
| H  | 0.23663800  | 3.61795900  | 2.40274600  |
| H  | 0.32476800  | 7.16551900  | 4.37721500  |
| O  | -0.33615500 | 2.16040600  | 4.42681700  |
| F  | -0.67077900 | 3.55794300  | 6.74107400  |

**5-Fu@[Al@B<sub>40</sub>]**

|   |             |             |             |
|---|-------------|-------------|-------------|
| B | -0.85608900 | 2.37840700  | -1.64653700 |
| B | -1.52616800 | 1.25909100  | -2.60948400 |
| B | -2.34063300 | 1.58258400  | -1.22761400 |
| B | -2.96861300 | 1.78114000  | 0.27792800  |
| B | -1.65243100 | 2.69521900  | -0.00035200 |
| B | -0.24338600 | 3.35022100  | -0.40293000 |
| B | 0.75339500  | 2.82106100  | -1.51338600 |
| B | 1.24992800  | 2.79593900  | 0.10568000  |
| B | 1.99159100  | 1.81632900  | -1.29462800 |
| B | 2.50381700  | 1.64277700  | 0.41135400  |
| B | 3.06191700  | 0.69232200  | -0.80824800 |
| B | -1.45256000 | -1.64108800 | -1.88936100 |
| B | -2.83047900 | -1.31952800 | -1.06885400 |
| B | -2.24130600 | -0.04237300 | -1.92216700 |
| B | -0.72839200 | -0.13469100 | -2.78297400 |
| B | 0.92448300  | -0.41340400 | -2.95393900 |
| B | 0.00271800  | -1.65646400 | -2.58691900 |
| B | 2.06462100  | 0.21158100  | -2.00852300 |



|    |             |             |             |
|----|-------------|-------------|-------------|
| B  | 1.47816000  | -1.53782100 | -1.78838500 |
| B  | 2.65259700  | -0.89791200 | -0.69665600 |
| B  | -1.66859900 | -2.09915500 | 1.48352600  |
| B  | -2.53594400 | -0.88168900 | 2.12977900  |
| B  | -2.87539100 | -1.18162700 | 0.55896800  |
| B  | -1.74924000 | -2.32210300 | -0.29423700 |
| B  | -0.63868300 | -3.02645700 | 0.58678300  |
| B  | -0.15579800 | -2.82557000 | 2.20006000  |
| B  | 0.98677300  | -2.73625800 | 0.77986500  |
| B  | 1.08342200  | -1.68199100 | 2.21064400  |
| B  | 1.99325000  | -2.37415100 | -0.48641400 |
| B  | 2.29458000  | -1.61636300 | 0.94230600  |
| B  | 2.40717100  | -0.66151500 | 2.26528200  |
| B  | -2.01768300 | 2.00775600  | 1.57854400  |
| B  | -2.86732100 | 0.46161900  | 1.25076800  |
| B  | -1.80209400 | 0.48285200  | 2.62496200  |
| B  | -0.32680000 | 0.64063600  | 3.42661100  |
| B  | -0.94955200 | 1.94256800  | 2.77118200  |
| B  | 1.02291600  | -0.09972100 | 2.95228600  |
| B  | 0.69785900  | 1.68048800  | 2.58076100  |
| B  | 2.17540200  | 0.94193300  | 2.01843400  |
| B  | 1.74124600  | 2.45300600  | 1.60829300  |
| Al | -0.04261200 | -0.49162800 | 0.16637300  |
| C  | -0.88358900 | -1.96473500 | 6.25612400  |
| N  | -0.70409400 | -2.34270100 | 4.92383800  |
| C  | -0.46826800 | -3.62804500 | 4.47409500  |
| C  | -0.40570400 | -4.64330700 | 5.44393700  |
| C  | -0.58322800 | -4.34860200 | 6.76997300  |
| N  | -0.81201200 | -3.03249400 | 7.14142400  |
| H  | -0.55354900 | -5.10037900 | 7.54574400  |
| O  | -1.08400300 | -0.81688400 | 6.59963900  |
| H  | -0.71669500 | -1.57211800 | 4.25742200  |
| H  | -0.94556000 | -2.78692300 | 8.11279600  |
| O  | -0.32592900 | -3.87980000 | 3.19928700  |
| F  | -0.17997600 | -5.90383000 | 5.04813000  |

**5-Fu@[Si@B<sub>40</sub>]**

|   |             |            |             |
|---|-------------|------------|-------------|
| B | -2.70557300 | 3.65202600 | -3.44266300 |
| B | -2.95304000 | 3.10136500 | -4.94943300 |
| B | -3.90176200 | 2.41000400 | -3.75926600 |
| B | -4.68907200 | 1.66579500 | -2.53146300 |
| B | -3.64983900 | 2.80649800 | -2.04936300 |
| B | -2.34055100 | 3.72148500 | -1.80045000 |
| B | -1.19935900 | 4.08335500 | -2.84207500 |
| B | -0.78892400 | 3.24513800 | -1.43308700 |

|    |             |             |             |
|----|-------------|-------------|-------------|
| B  | 0.20846400  | 3.34396700  | -3.04823000 |
| B  | 0.68317900  | 2.34288200  | -1.62881800 |
| B  | 1.49814100  | 2.35460700  | -3.04784300 |
| B  | -2.20785700 | 0.41612500  | -5.96487800 |
| B  | -3.81734000 | 0.02071500  | -5.38071600 |
| B  | -3.58012600 | 1.61428400  | -5.33397100 |
| B  | -1.86316300 | 2.16516300  | -5.73981100 |
| B  | -0.13601800 | 2.39885400  | -5.81787000 |
| B  | -0.77510200 | 1.03325500  | -6.34867900 |
| B  | 0.75442000  | 2.51392900  | -4.50156600 |
| B  | 0.65678500  | 0.97504300  | -5.46968700 |
| B  | 1.45954500  | 0.97234100  | -3.91462000 |
| B  | -2.59906800 | -1.95276000 | -3.49435700 |
| B  | -3.74280800 | -1.49224500 | -2.43444200 |
| B  | -3.81709100 | -0.75407000 | -3.93144800 |
| B  | -2.51371800 | -1.07867600 | -5.17603100 |
| B  | -1.36912300 | -2.09559300 | -4.67371900 |
| B  | -0.98555000 | -2.46817100 | -3.17659700 |
| B  | 0.09479100  | -1.52363400 | -4.06212000 |
| B  | 0.01515800  | -1.65068300 | -2.23324500 |
| B  | 1.08651800  | -0.40941600 | -4.71941300 |
| B  | 1.20909700  | -0.57015200 | -3.11324400 |
| B  | 0.99590300  | -0.59179400 | -1.48786600 |
| B  | -3.77408400 | 1.22420500  | -1.22326300 |
| B  | -4.34403900 | 0.05177500  | -2.46116700 |
| B  | -3.34006400 | -0.53816100 | -1.16263100 |
| B  | -1.98574600 | -0.80909400 | -0.08677900 |
| B  | -2.81465600 | 0.63846200  | -0.11673000 |
| B  | -0.50851100 | -0.71221200 | -0.85007600 |
| B  | -1.18292700 | 0.81284900  | -0.14860200 |
| B  | 0.39366700  | 0.78509500  | -0.84539600 |
| B  | -0.29057700 | 2.17733300  | -0.33918400 |
| Si | -2.11248400 | 0.72018600  | -3.85986000 |
| C  | -2.14142600 | -3.08296900 | 0.83683100  |
| N  | -2.40830200 | -3.93730500 | 1.85472300  |
| C  | -2.37061300 | -5.36133700 | 1.80699800  |
| C  | -1.98883000 | -5.84372900 | 0.47830800  |
| C  | -1.71940700 | -4.99403000 | -0.53185500 |
| N  | -1.80509600 | -3.62509300 | -0.34546500 |
| H  | -1.42801400 | -5.31682400 | -1.52361300 |
| O  | -2.23171100 | -1.82836200 | 1.05410700  |
| H  | -2.67121500 | -3.52737100 | 2.74635800  |
| H  | -1.54874600 | -3.01159800 | -1.13570000 |
| O  | -2.63254200 | -6.02929600 | 2.78102900  |

|                                 |             |             |             |
|---------------------------------|-------------|-------------|-------------|
| F                               | -1.91772000 | -7.16276900 | 0.32002500  |
| <b>5-Fu@[Mn@B<sub>40</sub>]</b> |             |             |             |
| B                               | -2.70740300 | 0.82905700  | -1.17708200 |
| B                               | -2.51401100 | -0.41387800 | -2.21571300 |
| B                               | -2.88371200 | -0.83337800 | -0.67882900 |
| B                               | -3.08017500 | -1.15860400 | 0.91183600  |
| B                               | -2.97025200 | 0.44460800  | 0.57362900  |
| B                               | -2.75859300 | 1.92372100  | 0.06595100  |
| B                               | -2.16886300 | 2.47873200  | -1.39045500 |
| B                               | -1.34313600 | 2.73464600  | 0.20300200  |
| B                               | -0.50725800 | 2.53429200  | -1.37354600 |
| B                               | 0.35853200  | 2.90120900  | 0.09715400  |
| B                               | 1.12319400  | 2.69803800  | -1.33242100 |
| B                               | -0.13078600 | -2.22687300 | -2.07869700 |
| B                               | -0.99488300 | -3.04902300 | -0.97509100 |
| B                               | -1.79864600 | -1.78312400 | -1.66181900 |
| B                               | -1.03813700 | -0.69228800 | -2.77813200 |
| B                               | 0.15687900  | 0.36742200  | -3.33346500 |
| B                               | 0.58685700  | -1.13514600 | -3.01471200 |
| B                               | 0.59080100  | 1.65045800  | -2.45099400 |
| B                               | 1.55888000  | 0.06869200  | -2.36507600 |
| B                               | 2.07796600  | 1.36200300  | -1.39683500 |
| B                               | 0.91041600  | -2.57619900 | 1.17111900  |
| B                               | -0.38509600 | -2.48741100 | 2.16114100  |
| B                               | -0.73384900 | -2.94512400 | 0.63506900  |
| B                               | 0.61695000  | -2.80097500 | -0.58208200 |
| B                               | 2.09118300  | -2.50049000 | -0.04004000 |
| B                               | 2.38353300  | -1.76821800 | 1.38369000  |
| B                               | 2.96486300  | -1.03418800 | -0.07461400 |
| B                               | 2.59520500  | -0.20651100 | 1.61219300  |
| B                               | 2.87609000  | -0.06188700 | -1.39286900 |
| B                               | 2.92595500  | 0.72943300  | 0.06428800  |
| B                               | 2.49248600  | 1.42890600  | 1.45949600  |
| B                               | -2.37839100 | -0.28159600 | 2.07023100  |
| B                               | -1.79998900 | -1.89308400 | 1.59750900  |
| B                               | -0.84323100 | -1.06576800 | 2.78042100  |
| B                               | 0.15091800  | 0.17284700  | 3.31026000  |
| B                               | -1.36674500 | 0.52529800  | 3.01214100  |
| B                               | 1.40493800  | 0.74616100  | 2.49853900  |
| B                               | -0.20754900 | 1.64039200  | 2.53047600  |
| B                               | 1.08910900  | 2.28186000  | 1.61250200  |
| B                               | -0.39734100 | 2.91487400  | 1.54581100  |
| Mn                              | 0.93434500  | -0.47163100 | -0.11580200 |
| C                               | -2.91750900 | 3.27830900  | -3.58974400 |

|   |             |            |             |
|---|-------------|------------|-------------|
| N | -3.72495500 | 4.05057100 | -4.35669700 |
| C | -3.77680500 | 4.08003000 | -5.78137600 |
| C | -2.81506900 | 3.14762600 | -6.37322100 |
| C | -2.00962000 | 2.38367600 | -5.60925900 |
| N | -2.07119200 | 2.45364100 | -4.22786500 |
| H | -1.28566200 | 1.68621800 | -6.01219500 |
| O | -3.01214300 | 3.37363900 | -2.31936000 |
| H | -4.37155600 | 4.66789900 | -3.87393300 |
| H | -1.41404900 | 1.87079600 | -3.68593200 |
| O | -4.54499400 | 4.80957800 | -6.36571100 |
| F | -2.77639800 | 3.09351000 | -7.70154300 |

**5-Fu@[Cu@B<sub>40</sub>]**

|   |             |             |             |
|---|-------------|-------------|-------------|
| B | -1.25817000 | 2.71988500  | -0.49041400 |
| B | -1.73519700 | 2.11552900  | -1.91041600 |
| B | -2.49824700 | 1.52748900  | -0.59123900 |
| B | -3.06055700 | 0.80846300  | 0.77460500  |
| B | -1.98332900 | 2.00120300  | 1.04643700  |
| B | -0.75361500 | 3.03644500  | 1.09077700  |
| B | 0.23328700  | 3.36186900  | -0.10356600 |
| B | 0.86149800  | 2.64098400  | 1.29318500  |
| B | 1.64646100  | 2.65913300  | -0.37971100 |
| B | 2.35083700  | 1.80305900  | 1.02274000  |
| B | 2.96936300  | 1.72165600  | -0.49413600 |
| B | -1.02945600 | -0.62936900 | -2.80969400 |
| B | -2.37199700 | -1.06463900 | -2.00251600 |
| B | -2.15108200 | 0.55383800  | -2.04031800 |
| B | -0.70254100 | 1.18538100  | -2.74129700 |
| B | 0.93462900  | 1.41462700  | -2.94729100 |
| B | 0.33188800  | 0.01001800  | -3.36604200 |
| B | 2.01072200  | 1.70055400  | -1.80102600 |
| B | 1.80671200  | 0.01394900  | -2.55923400 |
| B | 2.89000300  | 0.25533300  | -1.23023900 |
| B | -0.97220100 | -2.84944400 | -0.15124500 |
| B | -2.00560500 | -2.26279900 | 1.03321700  |
| B | -2.23505700 | -1.73198100 | -0.52195600 |
| B | -1.07816800 | -2.07723500 | -1.78967100 |
| B | 0.18212700  | -3.17388200 | -1.58720400 |
| B | 0.67758300  | -3.07632700 | 0.04539200  |
| B | 1.66377600  | -2.26012600 | -1.00253300 |
| B | 1.76867500  | -2.17395200 | 0.77753500  |
| B | 2.57871200  | -1.22211300 | -1.85390600 |
| B | 2.89255900  | -1.21124500 | -0.25040200 |
| B | 2.87254400  | -1.06810100 | 1.38469100  |
| B | -2.07106100 | 0.56727200  | 2.04706200  |

|    |             |             |             |
|----|-------------|-------------|-------------|
| B  | -2.68160300 | -0.77567200 | 0.98108500  |
| B  | -1.49650900 | -1.19250400 | 2.17439900  |
| B  | 0.02297200  | -1.14298700 | 2.89971000  |
| B  | -0.90283400 | 0.15201900  | 3.06482300  |
| B  | 1.50066800  | -1.24002200 | 2.25190200  |
| B  | 0.75479500  | 0.39082700  | 2.85787600  |
| B  | 2.27979600  | 0.33241100  | 2.00696000  |
| B  | 1.54705900  | 1.73002000  | 2.44231800  |
| Cu | -0.07871400 | -0.99320000 | 0.41085500  |
| C  | 0.67972800  | -3.10539600 | -5.76513300 |
| N  | 0.58774100  | -3.21300600 | -4.37756200 |
| C  | 0.44234500  | -4.39633100 | -3.66743400 |
| C  | 0.38525900  | -5.58328600 | -4.40649700 |
| C  | 0.47549400  | -5.55732800 | -5.77733100 |
| N  | 0.61513600  | -4.32917100 | -6.41591300 |
| H  | 0.44428100  | -6.44948500 | -6.38553400 |
| O  | 0.80513000  | -2.04061300 | -6.34025800 |
| H  | 0.61645600  | -2.32667200 | -3.87960800 |
| H  | 0.68092300  | -4.27699800 | -7.42280800 |
| O  | 0.38553900  | -4.38291600 | -2.35123000 |
| F  | 0.24540000  | -6.74898200 | -3.75696900 |

**5-Fu@[Zn@B<sub>40</sub>]**

|   |             |             |             |
|---|-------------|-------------|-------------|
| B | -0.75334100 | -1.78827200 | 2.12382400  |
| B | -1.09290300 | -0.46813600 | 3.01170700  |
| B | -2.17391500 | -0.84346200 | 1.86347000  |
| B | -3.06523100 | -1.08409100 | 0.48970200  |
| B | -1.85538500 | -2.16657200 | 0.68245600  |
| B | -0.52291500 | -3.02301800 | 0.96124900  |
| B | 0.72355800  | -2.54055500 | 1.81173500  |
| B | 0.92795600  | -2.82813100 | 0.14566100  |
| B | 2.04269200  | -1.80042500 | 1.26129200  |
| B | 2.24720300  | -1.90776100 | -0.51147500 |
| B | 3.13298800  | -0.92411600 | 0.44810500  |
| B | -0.61000800 | 2.16252000  | 1.79234300  |
| B | -2.19235600 | 2.11089800  | 1.31311800  |
| B | -1.67446500 | 0.85912200  | 2.25173600  |
| B | -0.03960300 | 0.79670800  | 2.81513700  |
| B | 1.61833200  | 0.80850100  | 2.70961700  |
| B | 0.91882900  | 2.29725700  | 2.45055200  |
| B | 2.41351700  | -0.11253700 | 1.69344900  |
| B | 2.14552700  | 1.64802900  | 1.37573100  |
| B | 2.94575300  | 0.67721700  | 0.16646900  |
| B | -1.41020500 | 2.28436300  | -1.47845600 |
| B | -2.58915100 | 1.21222100  | -1.79184400 |

|    |             |             |             |
|----|-------------|-------------|-------------|
| B  | -2.52450300 | 1.74373200  | -0.25845400 |
| B  | -1.18989300 | 2.84812800  | 0.26810300  |
| B  | -0.17296900 | 3.29269100  | -0.91715500 |
| B  | 0.03773900  | 2.55231100  | -2.30365900 |
| B  | 1.32041700  | 2.55006100  | -1.16871800 |
| B  | 1.10765300  | 1.39841700  | -2.64718600 |
| B  | 2.51478700  | 2.22768800  | -0.11707300 |
| B  | 2.43783500  | 1.25899700  | -1.43793800 |
| B  | 2.15849300  | 0.16167000  | -2.64229100 |
| B  | -2.42638700 | -1.63437600 | -0.90211000 |
| B  | -2.95498300 | 0.05768800  | -0.68254200 |
| B  | -2.14981000 | -0.30101200 | -2.17626200 |
| B  | -0.88204100 | -0.79274100 | -3.16052900 |
| B  | -1.56709600 | -1.89242500 | -2.24577500 |
| B  | 0.63298500  | -0.26674900 | -3.04082300 |
| B  | 0.11498300  | -1.90340000 | -2.34591700 |
| B  | 1.74826000  | -1.36083500 | -2.14747800 |
| B  | 1.19106900  | -2.73280200 | -1.45332900 |
| Zn | 0.02459400  | 0.08715600  | -0.07142900 |
| C  | 1.33293400  | 4.69784300  | 2.79108900  |
| N  | 1.71276000  | 5.74001100  | 3.56971800  |
| C  | 1.78213700  | 7.11097300  | 3.18550800  |
| C  | 1.37727100  | 7.29983100  | 1.79030700  |
| C  | 0.99881900  | 6.26304700  | 1.01726800  |
| N  | 0.98790800  | 4.97353400  | 1.52207500  |
| H  | 0.69007100  | 6.37063800  | -0.01488000 |
| O  | 1.33061900  | 3.52553900  | 3.29483600  |
| H  | 1.98135100  | 5.52985300  | 4.52678000  |
| H  | 0.65620100  | 4.21060000  | 0.91489600  |
| O  | 2.13887500  | 7.96416800  | 3.96546200  |
| F  | 1.39967800  | 8.54582100  | 1.32609100  |

**(3) 5-Fu@B<sub>39</sub>M (M = Mg, Al, Si, Mn, Cu, and Zn) complexes at the B3LYP-D3/6-31G(d)&SDD level**

**5-Fu@B<sub>39</sub>Mg**

|   |             |             |             |
|---|-------------|-------------|-------------|
| B | -2.85352200 | 2.15534600  | -1.45042400 |
| B | -1.34696300 | 2.47076400  | -1.94496200 |
| B | -2.05020100 | 1.12709400  | -2.57350300 |
| B | -2.65699200 | -0.31070900 | -3.01760200 |
| B | -3.62507600 | 0.55875000  | -2.05646400 |
| B | -4.30117600 | 1.46403300  | -0.91226300 |
| B | -3.57382800 | 2.52476700  | 0.01064000  |
| B | -4.21474800 | 1.12910700  | 0.72210400  |
| B | -2.93193500 | 2.25448200  | 1.45524400  |

|    |             |             |             |
|----|-------------|-------------|-------------|
| B  | -3.49363300 | 0.75566600  | 2.24788200  |
| B  | -2.25906000 | 1.69014200  | 2.81423800  |
| B  | 1.06898300  | 0.85458700  | -1.16760900 |
| B  | 0.63793000  | 0.06318900  | -2.57037500 |
| B  | -0.28909200 | 1.37024200  | -2.42013300 |
| B  | -0.11639600 | 2.21870800  | -0.90161500 |
| B  | -0.11513700 | 2.70973900  | 0.69871700  |
| B  | 1.08459800  | 1.79043200  | 0.18235400  |
| B  | -1.21895900 | 2.37227200  | 1.79265800  |
| B  | 0.43673200  | 1.44285800  | 1.72588700  |
| B  | -0.75050800 | 1.02236800  | 2.90524800  |
| B  | 0.43953900  | -2.21994600 | -0.73678400 |
| B  | -0.91369500 | -2.71171300 | -1.67166500 |
| B  | -0.05951500 | -1.46125200 | -2.20265600 |
| B  | 1.19347800  | -0.80356500 | -1.33531400 |
| B  | 0.44340800  | -2.34819600 | 0.90760400  |
| B  | 0.63209800  | -1.41589300 | 2.17700500  |
| B  | -0.83739200 | -2.18250200 | 1.93353300  |
| B  | 0.59960900  | 0.17428500  | 2.71886300  |
| B  | -0.69307700 | -0.80924100 | 3.04775500  |
| B  | -2.05216200 | -1.67504300 | 3.00902900  |
| B  | -3.47352400 | -1.22218500 | -1.95434200 |
| B  | -1.80686100 | -1.61133300 | -2.48725200 |
| B  | -2.45389100 | -2.58956400 | -1.23668000 |
| B  | -3.10100700 | -2.92852500 | 0.27281200  |
| B  | -4.00957300 | -2.12984300 | -0.75331700 |
| B  | -2.51655700 | -2.51412200 | 1.71830700  |
| B  | -4.01748600 | -1.60007500 | 0.81692700  |
| B  | -3.33567100 | -0.98874200 | 2.28838000  |
| B  | -4.54789900 | -0.24485700 | 1.50683400  |
| C  | 4.72410500  | 0.79962000  | 0.51815700  |
| N  | 6.06987900  | 0.70066900  | 0.70813400  |
| C  | 7.06684600  | 1.64003600  | 0.32507500  |
| C  | 6.48370500  | 2.80941700  | -0.33811800 |
| C  | 5.15568700  | 2.92315600  | -0.53287800 |
| N  | 4.29603800  | 1.92383100  | -0.10970800 |
| H  | 4.70525000  | 3.77916000  | -1.01932200 |
| O  | 3.94713300  | -0.10430500 | 0.90770200  |
| H  | 6.40426800  | -0.13732900 | 1.17477700  |
| H  | 3.27759500  | 2.01242400  | -0.23796500 |
| O  | 8.23997400  | 1.44185900  | 0.54781000  |
| F  | 7.33131400  | 3.75505700  | -0.73825200 |
| Mg | 2.00703300  | -0.48043600 | 0.76877400  |

**5-Fu@B<sub>39</sub>Al**

|    |             |             |             |
|----|-------------|-------------|-------------|
| B  | -3.06064200 | 2.07510100  | -1.50230400 |
| B  | -1.64807000 | 2.45458900  | -2.18712400 |
| B  | -2.31720500 | 1.04892200  | -2.67008600 |
| B  | -2.88295700 | -0.45319100 | -2.94355400 |
| B  | -3.79349100 | 0.41870800  | -1.92023300 |
| B  | -4.39006200 | 1.34656700  | -0.75054900 |
| B  | -3.63250700 | 2.52061600  | 0.00068800  |
| B  | -4.09778700 | 1.15098600  | 0.88233900  |
| B  | -2.81692800 | 2.38913400  | 1.37344100  |
| B  | -3.19082100 | 0.91937100  | 2.32956500  |
| B  | -1.96070700 | 1.95221400  | 2.68280800  |
| B  | 0.95702300  | 1.10190600  | -1.55093400 |
| B  | 0.48111100  | 0.09673700  | -2.73639200 |
| B  | -0.54934800 | 1.34506600  | -2.59642700 |
| B  | -0.31415900 | 2.42757300  | -1.27378500 |
| B  | -0.15145000 | 3.02100600  | 0.27185700  |
| B  | 1.04391400  | 2.16159200  | -0.32540700 |
| B  | -1.07999200 | 2.64860900  | 1.51950600  |
| B  | 0.57641800  | 1.83641700  | 1.25729500  |
| B  | -0.43853800 | 1.33896800  | 2.56573600  |
| B  | 0.38699200  | -2.17047500 | -0.82392200 |
| B  | -0.88644400 | -2.69558600 | -1.70928800 |
| B  | -0.11081100 | -1.37378400 | -2.25802000 |
| B  | 1.26282000  | -0.63640700 | -1.50754700 |
| B  | 0.71044400  | -2.34081400 | 0.79970100  |
| B  | 0.97947900  | -0.92202800 | 1.63425900  |
| B  | -0.38362500 | -2.01593700 | 1.93667000  |
| B  | 0.97008500  | 0.59217900  | 2.21243300  |
| B  | -0.20715900 | -0.42038900 | 2.74825600  |
| B  | -1.48696200 | -1.39145400 | 2.99909800  |
| B  | -3.52481600 | -1.31665700 | -1.72831200 |
| B  | -1.89396400 | -1.65475500 | -2.42645800 |
| B  | -2.35389000 | -2.57104400 | -1.03662900 |
| B  | -2.83708400 | -2.89097600 | 0.52977300  |
| B  | -3.87721000 | -2.15502800 | -0.41627600 |
| B  | -2.12614300 | -2.31307200 | 1.84531500  |
| B  | -3.72633200 | -1.57433300 | 1.13495400  |
| B  | -2.91809900 | -0.82914700 | 2.46387700  |
| B  | -4.24878200 | -0.18912100 | 1.77473100  |
| Al | 2.32993600  | -1.34777100 | 0.06093900  |
| C  | 4.64435200  | 0.25215700  | 0.43270600  |
| N  | 5.95096500  | 0.38321100  | 0.76864500  |
| C  | 6.72296400  | 1.58300200  | 0.77256500  |
| C  | 5.92358300  | 2.73565800  | 0.35393900  |



|   |            |             |             |
|---|------------|-------------|-------------|
| C | 4.62564800 | 2.60956400  | 0.01669700  |
| N | 4.00215500 | 1.37283700  | 0.05135700  |
| H | 4.00302600 | 3.44166600  | -0.28837200 |
| O | 4.09734900 | -0.89595400 | 0.49152400  |
| H | 6.43911100 | -0.45884700 | 1.06035100  |
| H | 2.99827100 | 1.34683500  | -0.20833800 |
| O | 7.88833800 | 1.57752400  | 1.09552500  |
| F | 6.54166900 | 3.91273600  | 0.32665900  |

**5-Fu@B<sub>39</sub>Si**

|   |             |             |             |
|---|-------------|-------------|-------------|
| B | -1.68627700 | -2.22928500 | 2.16734300  |
| B | -0.50324400 | -1.33491000 | 2.81061700  |
| B | -2.00774900 | -0.76188500 | 2.99230300  |
| B | -3.49027400 | -0.06551200 | 2.87745200  |
| B | -3.40994000 | -1.54117300 | 2.20218400  |
| B | -3.06095700 | -2.88378400 | 1.40413300  |
| B | -1.62181700 | -3.30702500 | 0.89030700  |
| B | -2.83590400 | -2.96298900 | -0.24576700 |
| B | -0.98991500 | -3.01920500 | -0.55603100 |
| B | -2.18355200 | -2.50729200 | -1.78106300 |
| B | -0.56281500 | -2.43776500 | -1.99795100 |
| B | 0.38391700  | 1.17452000  | 1.46670600  |
| B | -0.76484700 | 1.87360300  | 2.39144600  |
| B | -0.57167700 | 0.28414600  | 2.65945400  |
| B | 0.52977500  | -0.62934500 | 1.74546600  |
| B | 1.23027700  | -1.24150000 | 0.39244100  |
| B | 1.58134200  | 0.38800100  | 0.62399100  |
| B | 0.36566200  | -1.91973600 | -0.74386500 |
| B | 0.95442000  | -0.21583000 | -0.89875000 |
| B | 0.03948600  | -0.93464600 | -2.20491800 |
| B | -2.17686600 | 2.82958300  | 0.05415900  |
| B | -3.57012100 | 2.49606700  | 0.86389400  |
| B | -2.17793200 | 2.30768900  | 1.66517600  |
| B | -0.62267200 | 2.50382100  | 0.90457300  |
| B | -1.94675500 | 2.76217000  | -1.58904000 |
| B | -0.61721500 | 1.79690700  | -1.97631500 |
| B | -2.35324400 | 1.49803700  | -2.47199100 |
| B | 0.47849200  | 0.63470200  | -2.19167900 |
| B | -1.01621600 | 0.35145400  | -2.79875500 |
| B | -2.56743300 | 0.04453800  | -3.20139400 |
| B | -4.45410600 | -0.25588700 | 1.58606900  |
| B | -3.62497400 | 1.27306800  | 1.94950600  |
| B | -4.47717100 | 1.22389700  | 0.46253400  |
| B | -4.85583100 | 0.68893100  | -1.06866100 |
| B | -5.15384800 | -0.29669400 | 0.13910000  |

|    |             |             |             |
|----|-------------|-------------|-------------|
| B  | -3.79185500 | 0.47042700  | -2.24048000 |
| B  | -4.45376800 | -0.95406000 | -1.22779100 |
| B  | -3.22857000 | -1.22341200 | -2.41196800 |
| B  | -3.77691800 | -2.40695800 | -1.43241700 |
| C  | 4.09253200  | 0.34043800  | 0.39436500  |
| N  | 5.26275700  | 1.01908300  | 0.48468500  |
| C  | 6.56098800  | 0.52112100  | 0.17400900  |
| C  | 6.51030800  | -0.87312500 | -0.27715700 |
| C  | 5.34752800  | -1.54838200 | -0.36473600 |
| N  | 4.15177200  | -0.93250700 | -0.03404800 |
| H  | 5.28774500  | -2.57789800 | -0.69437000 |
| O  | 3.01582600  | 0.94321000  | 0.72425500  |
| H  | 5.21497600  | 1.98308600  | 0.80363300  |
| H  | 3.23962400  | -1.43246800 | -0.05769500 |
| O  | 7.54572000  | 1.21313100  | 0.28968800  |
| F  | 7.67095400  | -1.43744800 | -0.59682600 |
| Si | -0.23483500 | 3.50742200  | -0.82536600 |

**5-Fu@B<sub>39</sub>Mn**

|   |             |             |             |
|---|-------------|-------------|-------------|
| B | -3.69358100 | 1.03891600  | -2.11381200 |
| B | -2.43910200 | 1.45077000  | -3.04441000 |
| B | -2.71727900 | -0.15534200 | -2.87319600 |
| B | -2.85754400 | -1.74160100 | -2.51873000 |
| B | -3.95760700 | -0.79746500 | -1.80612300 |
| B | -4.76786600 | 0.33657400  | -1.00664900 |
| B | -4.34654100 | 1.84895700  | -0.80662300 |
| B | -4.43926900 | 0.84105400  | 0.55119600  |
| B | -3.53446600 | 2.45522900  | 0.43386400  |
| B | -3.50875100 | 1.42276500  | 1.88349700  |
| B | -2.58916000 | 2.78235600  | 1.70705000  |
| B | 0.40021800  | 1.01784500  | -2.25532900 |
| B | 0.14222300  | -0.42597600 | -3.01717600 |
| B | -1.13170000 | 0.54834600  | -3.22884800 |
| B | -1.08919900 | 2.06179000  | -2.32388600 |
| B | -1.11194100 | 3.17711300  | -1.08982800 |
| B | 0.26113400  | 2.43176700  | -1.40318200 |
| B | -1.92950100 | 3.12945700  | 0.28224600  |
| B | -0.08545600 | 2.77324000  | 0.21539700  |
| B | -0.94599700 | 2.62094700  | 1.70396200  |
| B | 0.82933000  | -1.56569600 | -0.40536300 |
| B | -0.31092900 | -2.75436400 | -0.76400400 |
| B | 0.05656800  | -1.72123100 | -1.94792700 |
| B | 1.02137000  | -0.38121100 | -1.65621400 |
| B | 1.10109300  | -0.81504300 | 1.03601500  |
| B | 1.08915500  | 0.56947400  | 1.79179800  |

|    |             |             |             |
|----|-------------|-------------|-------------|
| B  | -0.10105800 | -0.52370800 | 2.18680200  |
| B  | 0.59963400  | 2.15831100  | 1.56793000  |
| B  | -0.26921900 | 1.19504300  | 2.59827400  |
| B  | -1.28352700 | 0.09799600  | 3.22498800  |
| B  | -3.21605000 | -2.20041300 | -1.00554300 |
| B  | -1.59046500 | -2.40643700 | -1.71266200 |
| B  | -1.75170000 | -2.80024400 | -0.04845700 |
| B  | -2.08863000 | -2.50789800 | 1.56519500  |
| B  | -3.30843300 | -2.53540200 | 0.55452700  |
| B  | -1.55671700 | -1.33630800 | 2.53266900  |
| B  | -3.34184300 | -1.37766300 | 1.74095600  |
| B  | -2.78677800 | 0.01317700  | 2.62541300  |
| B  | -4.23243400 | -0.04094800 | 1.89434000  |
| C  | 4.63589300  | 0.87056300  | 0.27293900  |
| N  | 4.48065900  | -0.09596000 | 1.22186600  |
| C  | 5.50232600  | -0.75446100 | 1.95220800  |
| C  | 6.84209700  | -0.28372400 | 1.57759200  |
| C  | 7.02164900  | 0.66871300  | 0.64395700  |
| N  | 5.92784000  | 1.23308000  | 0.00488200  |
| H  | 8.00140300  | 1.02830000  | 0.35680100  |
| O  | 3.69121100  | 1.41514900  | -0.33562000 |
| H  | 3.51406700  | -0.37443900 | 1.43470500  |
| H  | 6.04953100  | 1.94859000  | -0.69970200 |
| O  | 5.25193700  | -1.60075100 | 2.78108900  |
| F  | 7.87500600  | -0.84222500 | 2.20724100  |
| Mn | 1.60227300  | 1.07147300  | -0.23846200 |

### 5-Fu@B<sub>39</sub>Cu

|   |             |             |             |
|---|-------------|-------------|-------------|
| B | -2.85265200 | 2.11527600  | -1.52553400 |
| B | -1.36632900 | 2.51626700  | -2.02331500 |
| B | -1.97746000 | 1.12081700  | -2.63645800 |
| B | -2.56465500 | -0.34648100 | -3.08828600 |
| B | -3.56513300 | 0.48504000  | -2.11647200 |
| B | -4.27851900 | 1.38123700  | -0.99033800 |
| B | -3.61231900 | 2.51201700  | -0.09726900 |
| B | -4.20863000 | 1.12197900  | 0.65470800  |
| B | -2.99198500 | 2.33988400  | 1.37110600  |
| B | -3.48487000 | 0.82548500  | 2.19625400  |
| B | -2.34094600 | 1.85867700  | 2.78030100  |
| B | 0.97868000  | 0.93113200  | -0.98209300 |
| B | 0.66899400  | 0.00231100  | -2.26877900 |
| B | -0.28479000 | 1.33302600  | -2.22276000 |
| B | -0.19836700 | 2.45172800  | -0.90856000 |
| B | -0.20277200 | 2.97625500  | 0.65566300  |
| B | 0.98059300  | 2.01531700  | 0.21439200  |

|    |             |             |             |
|----|-------------|-------------|-------------|
| B  | -1.29656100 | 2.57592000  | 1.76353400  |
| B  | 0.38306200  | 1.83653700  | 1.76622800  |
| B  | -0.80077900 | 1.30338700  | 2.89215600  |
| B  | 0.23665800  | -2.39786900 | -0.76094200 |
| B  | -0.86587300 | -2.82618600 | -1.84732100 |
| B  | 0.02226400  | -1.48155900 | -2.17965300 |
| B  | 0.72638900  | -0.76434800 | -0.76750100 |
| B  | 0.67115100  | -1.78649200 | 0.65890600  |
| B  | 0.77610100  | -0.84783500 | 2.00878200  |
| B  | -0.64674800 | -1.71734100 | 1.76707600  |
| B  | 0.65678100  | 0.58660300  | 2.76164000  |
| B  | -0.53911300 | -0.50288900 | 3.03197600  |
| B  | -1.84153600 | -1.44495800 | 2.91663300  |
| B  | -3.35665000 | -1.25373500 | -1.99065300 |
| B  | -1.74549400 | -1.67865500 | -2.59544800 |
| B  | -2.39210600 | -2.64428600 | -1.31724700 |
| B  | -2.90819200 | -2.85242500 | 0.25905000  |
| B  | -3.89072800 | -2.11618400 | -0.74572100 |
| B  | -2.25935000 | -2.31938200 | 1.62599900  |
| B  | -3.90852100 | -1.59956900 | 0.81345900  |
| B  | -3.23079000 | -0.90628000 | 2.24684000  |
| B  | -4.49067100 | -0.24754300 | 1.47396000  |
| C  | 4.91562500  | 0.28808300  | 0.55669500  |
| N  | 6.26426600  | 0.50376300  | 0.52360500  |
| C  | 6.94318700  | 1.68473300  | 0.12013600  |
| C  | 6.00838800  | 2.73516600  | -0.28956900 |
| C  | 4.67587000  | 2.54038700  | -0.26538900 |
| N  | 4.14561300  | 1.33312700  | 0.15493000  |
| H  | 3.95993300  | 3.29698400  | -0.56230600 |
| O  | 4.45793600  | -0.81529700 | 0.93828400  |
| H  | 6.85372100  | -0.26690400 | 0.82301300  |
| H  | 3.12460500  | 1.22054300  | 0.13219900  |
| O  | 8.15283800  | 1.75400600  | 0.13593200  |
| F  | 6.54000100  | 3.89068200  | -0.68681000 |
| Cu | 2.58954800  | -1.27546400 | 1.15821600  |

### 5-Fu@B<sub>39</sub>Zn

|   |             |             |             |
|---|-------------|-------------|-------------|
| B | -2.99724000 | 2.09789400  | -1.53123900 |
| B | -1.56102000 | 2.44693400  | -2.18196900 |
| B | -2.25423500 | 1.05243800  | -2.67779700 |
| B | -2.83856300 | -0.43719000 | -2.97042000 |
| B | -3.75472600 | 0.45051600  | -1.97079600 |
| B | -4.36340200 | 1.39259100  | -0.82336300 |
| B | -3.60272900 | 2.53595500  | -0.03451700 |
| B | -4.12056400 | 1.16508400  | 0.81410100  |

|    |             |             |             |
|----|-------------|-------------|-------------|
| B  | -2.83787600 | 2.39178400  | 1.37037000  |
| B  | -3.28161700 | 0.92562000  | 2.30485100  |
| B  | -2.05423800 | 1.94391500  | 2.71779800  |
| B  | 0.95572700  | 0.99482200  | -1.46745500 |
| B  | 0.49334200  | 0.05240700  | -2.73411800 |
| B  | -0.48329900 | 1.33174600  | -2.61435600 |
| B  | -0.24448500 | 2.35027800  | -1.22947400 |
| B  | -0.15013900 | 2.91067100  | 0.34425400  |
| B  | 1.02752100  | 1.99286900  | -0.20016100 |
| B  | -1.11719600 | 2.59483100  | 1.57221600  |
| B  | 0.51555900  | 1.73375700  | 1.38689300  |
| B  | -0.52808800 | 1.31382000  | 2.69620100  |
| B  | 0.42570700  | -2.13862700 | -0.80350300 |
| B  | -0.91333500 | -2.71846100 | -1.67410600 |
| B  | -0.13641200 | -1.44028500 | -2.25608400 |
| B  | 1.18986200  | -0.70390900 | -1.49292700 |
| B  | 0.58552500  | -2.27141600 | 0.83241700  |
| B  | 0.88677000  | -0.97227300 | 1.79520800  |
| B  | -0.51355000 | -1.98702500 | 1.96803300  |
| B  | 0.86507000  | 0.53970100  | 2.41138300  |
| B  | -0.34243100 | -0.46862700 | 2.88282100  |
| B  | -1.65115500 | -1.41109400 | 3.04677800  |
| B  | -3.52927300 | -1.30192200 | -1.78493900 |
| B  | -1.89642000 | -1.66765000 | -2.43437200 |
| B  | -2.39887300 | -2.58720700 | -1.07376300 |
| B  | -2.90276000 | -2.86215000 | 0.49818800  |
| B  | -3.92242200 | -2.14482200 | -0.48224100 |
| B  | -2.22561100 | -2.32075200 | 1.85717400  |
| B  | -3.80894100 | -1.53395300 | 1.05925000  |
| B  | -3.03524100 | -0.81415800 | 2.42777200  |
| B  | -4.34055600 | -0.15964700 | 1.71319400  |
| C  | 4.78779800  | 0.27617700  | 0.37839400  |
| N  | 6.11805800  | 0.45191000  | 0.62484400  |
| C  | 6.84727300  | 1.67277700  | 0.60948800  |
| C  | 5.98814900  | 2.81274400  | 0.28178200  |
| C  | 4.67430800  | 2.65504300  | 0.03092100  |
| N  | 4.09215200  | 1.39966900  | 0.07439200  |
| H  | 4.01255800  | 3.47805200  | -0.20933300 |
| O  | 4.27843800  | -0.87123800 | 0.43812400  |
| H  | 6.65172800  | -0.38058100 | 0.85602900  |
| H  | 3.08580700  | 1.32856600  | -0.12735200 |
| O  | 8.03407200  | 1.70120100  | 0.84947600  |
| F  | 6.56854600  | 4.01093500  | 0.24589800  |
| Zn | 2.35208600  | -1.36704300 | 0.21928200  |
